# Supplementary material for: MicroRNA-4429 suppresses proliferation of prostate cancer cells by targeting distal-less homeobox 1 and inactivating the Wnt/β-catenin pathway
Source: PubMed Central journal article supplement (PMC7980590; doi:10.1186/s12894-021-00810-x), 2021-03-19

Supplementary Fig S1

Original western blots for Figure 3F

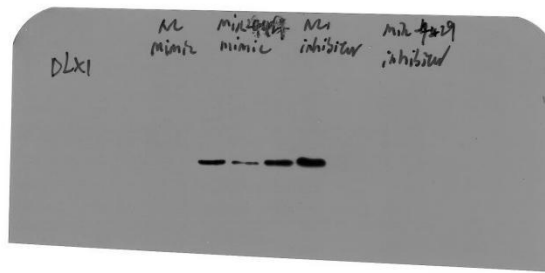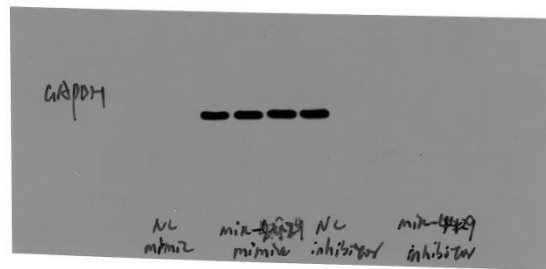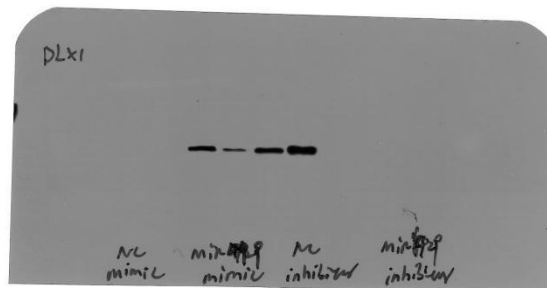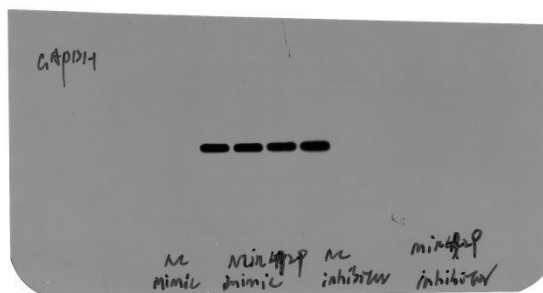

Supplementary Fig S2

Original western blots for Figure 4A

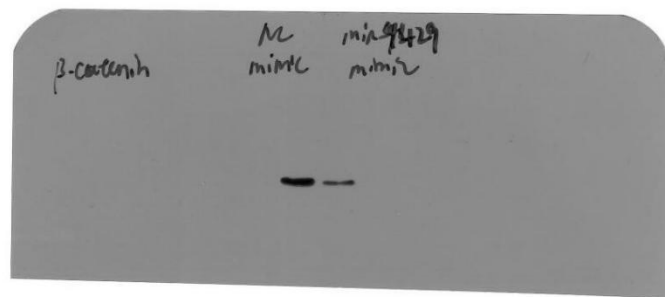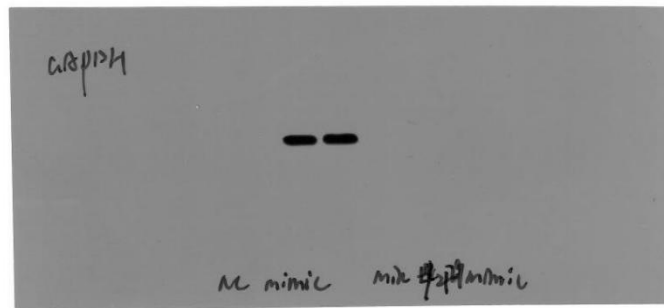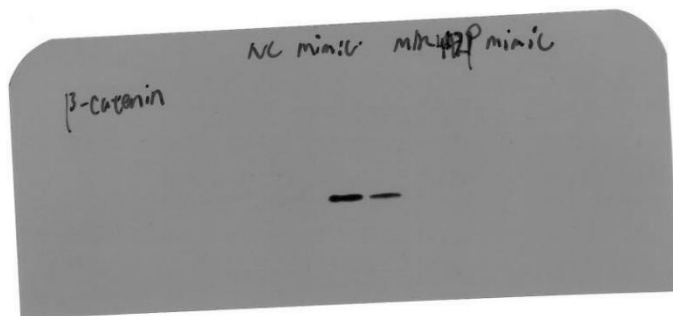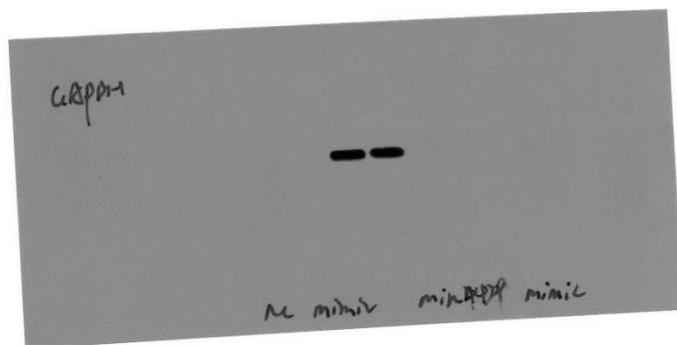

Supplementary Fig S3

Original western blots for Figure 4B

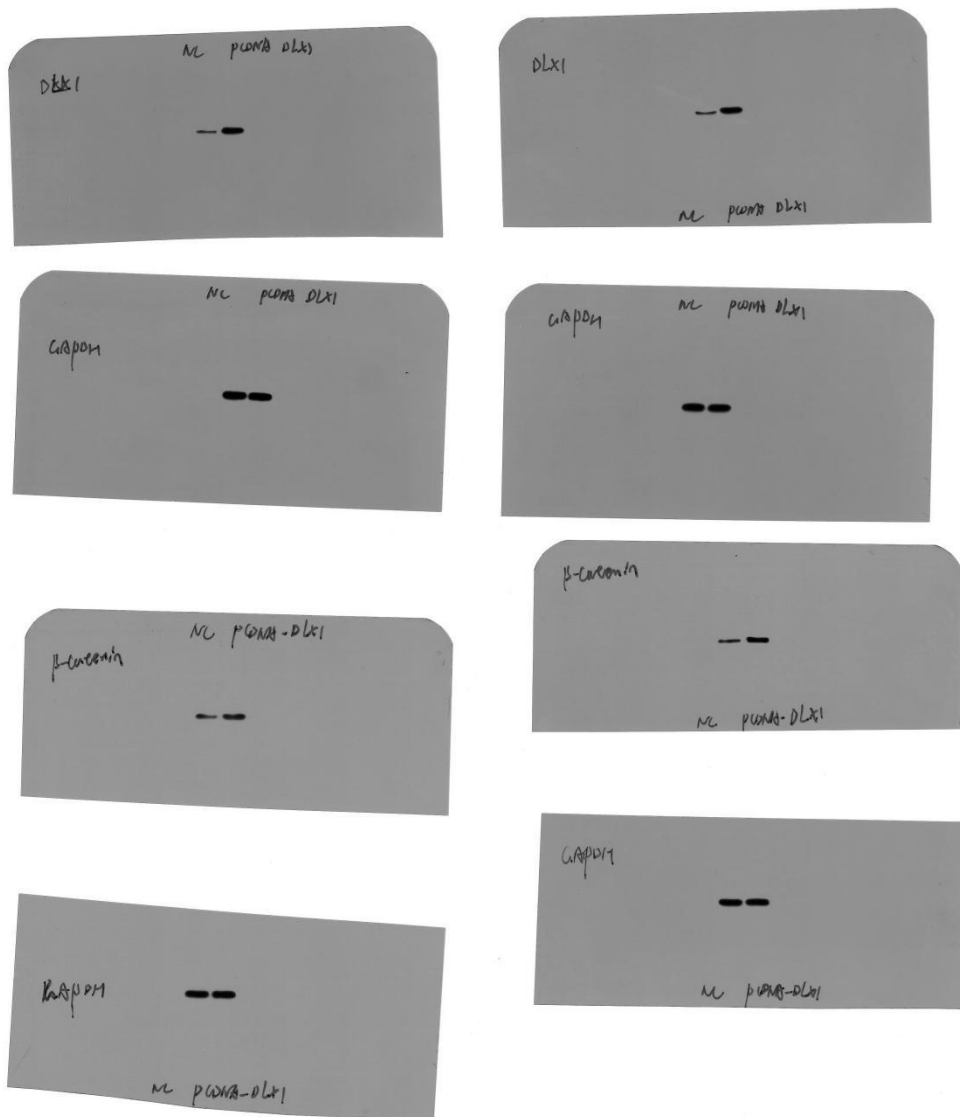

Supplementary Fig S4

Original western blots for Figure 5A

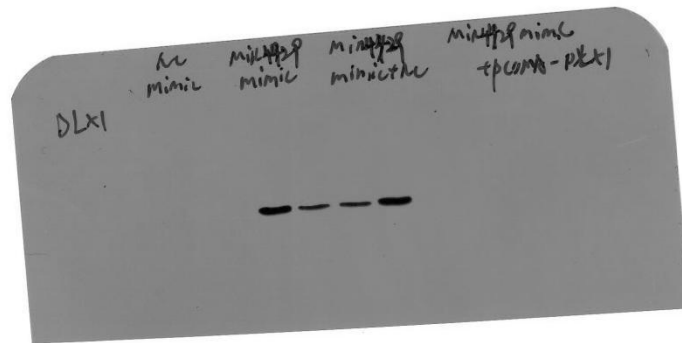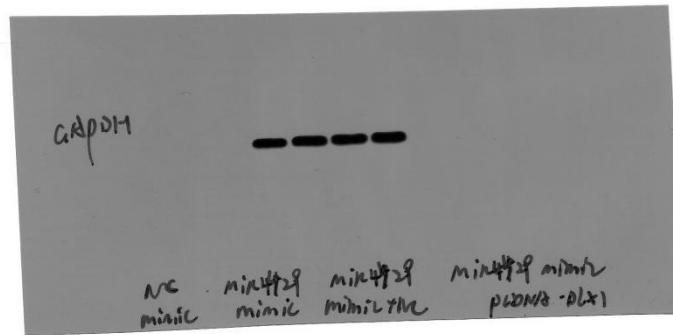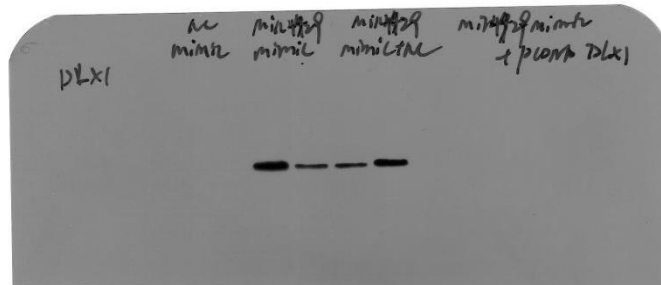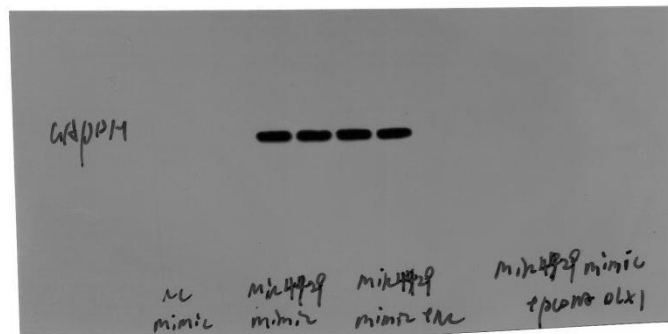

Supplement: 12894_2021_810_MOESM1_ESM.pdf [file 12894_2021_810_MOESM1_ESM.pdf]
